# Supplementary material
Source: PubMed Central journal article supplement (PMC2662444)
Supplement: NIHMS81509-supplement-01.pdf [file NIHMS81509-supplement-01.pdf]

# **Supplementary Material for**

## **Iron Prochelator BSIH Protects Retinal Pigment Epithelial Cells against Cell Death Induced by Hydrogen Peroxide**

Louise K. Charkoudian,<sup>†</sup> Tzvete Dentchev,<sup>‡</sup> Nina Lukinova,<sup>‡</sup> Natalie Wolkow,<sup>‡</sup> Joshua L. Dunaief,<sup>‡</sup> and Katherine J. Franz<sup>†\*</sup>

<sup>†</sup>Department of Chemistry, Duke University, Durham, North Carolina 27708-0346

<sup>‡</sup>F. M. Kirby Center for Molecular Ophthalmology, Scheie Eye Institute, University of Pennsylvania, Philadelphia, Pennsylvania, 19104

\*Corresponding author, [katherine.franz@duke.edu](mailto:katherine.franz@duke.edu); fax (919) 660-1605

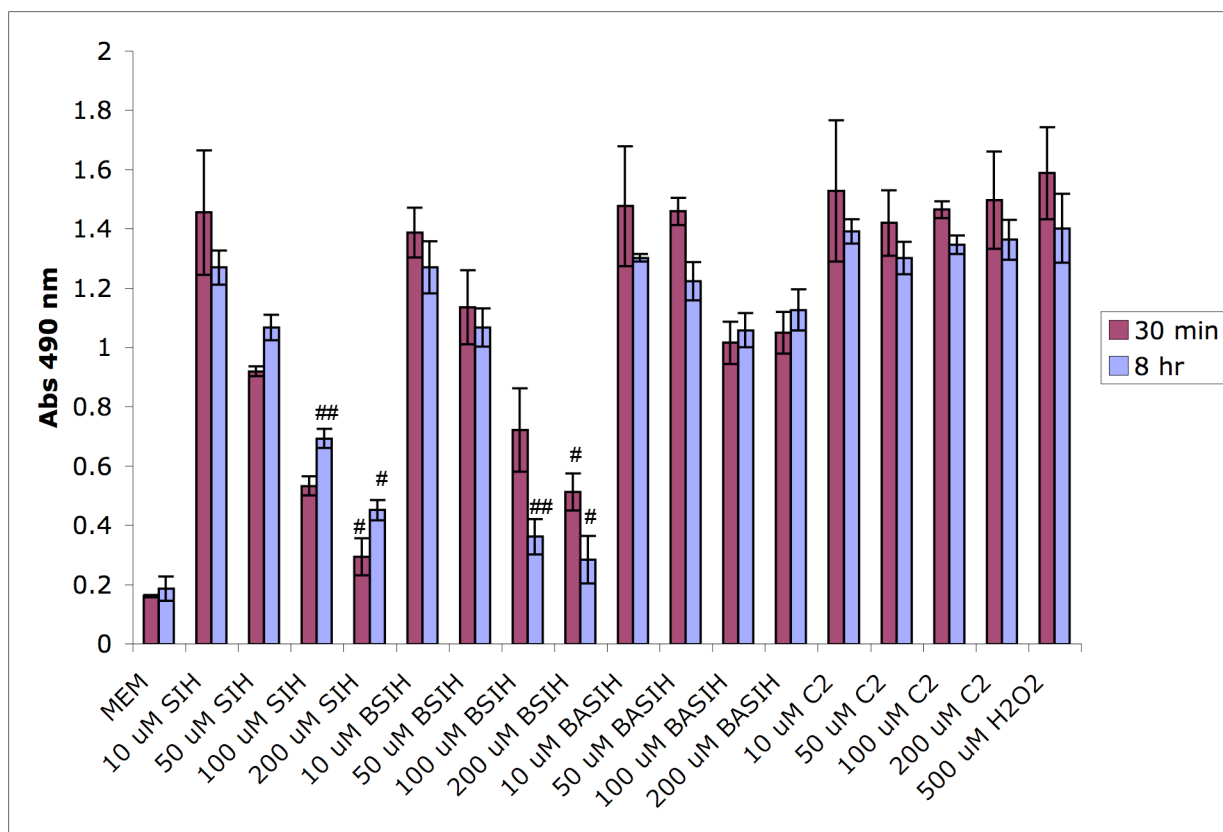

**Figure S1.** LDH assay of ARPE-19 cells pretreated with chelator or prochelator for 30 min or 8 h then with 500  $\mu\text{M}$   $\text{H}_2\text{O}_2$  for 18 h. The absorbance at 490 indicates release of LDH, signifying cell death. “MEM” is a control of cell viability that received neither pre-treatment nor  $\text{H}_2\text{O}_2$ . “H2O2” is a control showing maximal cell death when cells are treated with 500  $\mu\text{M}$   $\text{H}_2\text{O}_2$  without any pre-treatment. SIH, BSIH, BASIH are the chelator and prochelators shown in Figure 1; C2 is an analog of BSIH in which the boronate mask is positioned to release a non-iron-binding product. Statistical significance is shown for comparison between SIH and BSIH at the same concentration and pretreatment time, #  $p < 0.05$ , ##  $p < 0.01$ .

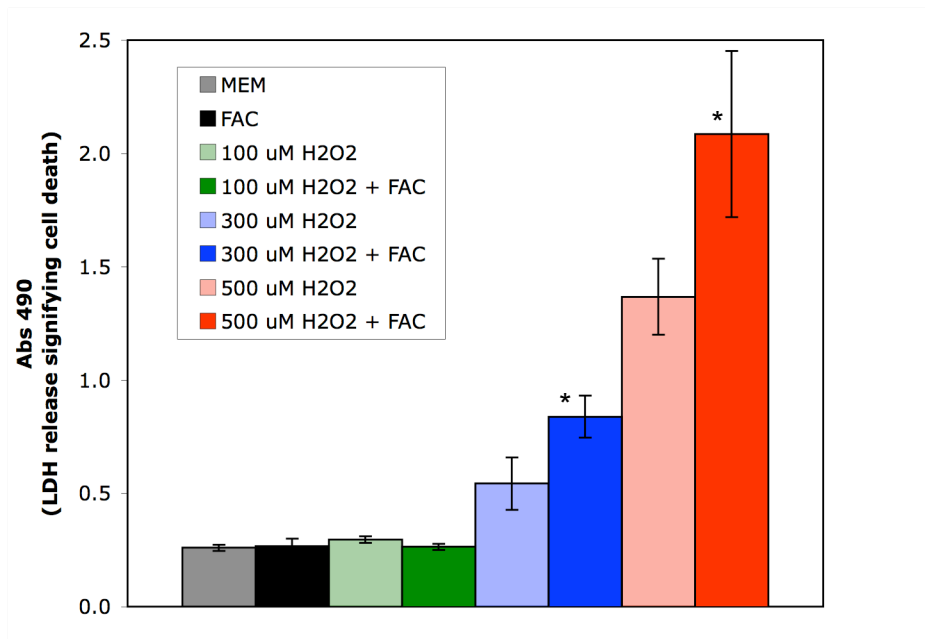

**Figure S2.** LDH assay of ARPE-19 cells subjected to 100, 300, or 500  $\mu\text{M}$   $\text{H}_2\text{O}_2$  with or without pretreatment with 250  $\mu\text{M}$  ferric ammonium citrate (FAC) for 24 h. Preloading the cells with iron makes them more susceptible to  $\text{H}_2\text{O}_2$ -induced cell death, as shown by the greater LDH release for cells that received both FAC and  $\text{H}_2\text{O}_2$  compared to cells that were exposed to the equiv amount of  $\text{H}_2\text{O}_2$  without FAC pretreatment. Cell death was monitored by the  $A_{490}$  of released LDH 18 h after peroxide exposure. “MEM” is a control that was not exposed to FAC or  $\text{H}_2\text{O}_2$ ; “FAC” is a control that received only FAC but no  $\text{H}_2\text{O}_2$ . Statistical significance is shown relative to samples that received the same concentration of  $\text{H}_2\text{O}_2$  but no FAC, \*  $p < 0.05$ .

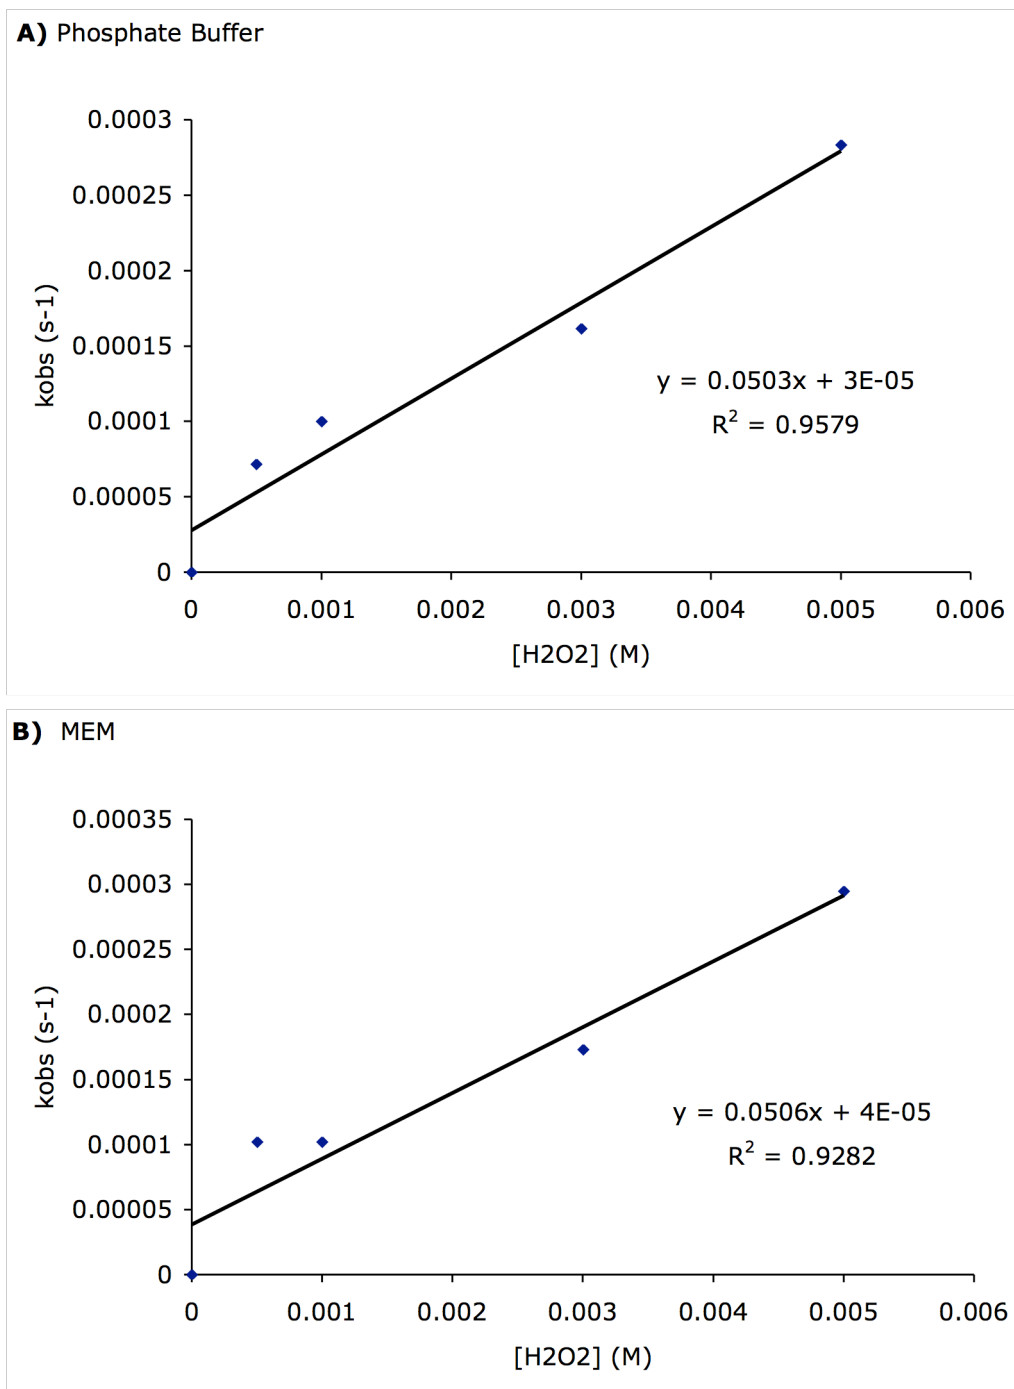

**Figure S3.** Plots of  $k_{\text{obs}}$  vs  $\text{H}_2\text{O}_2$  concentration for the conversion of  $50 \mu\text{M}$  BSIH to SIH in **A)**  $20 \text{ mM NaHPO}_4$  buffer at pH 7.4 or **B)** MEM cell culture media at pH 7.5. Spectral changes were monitored by UV-vis spectrophotometry to get the observed pseudo-first-order rate constants,  $k_{\text{obs}}$ . A rate constant  $k = 0.05 \text{ M}^{-1}\text{s}^{-1}$  was obtained from the slope of these lines for both solution conditions. The same rate was observed previously in a 50/50 methanol/phosphate buffer solution.[1]

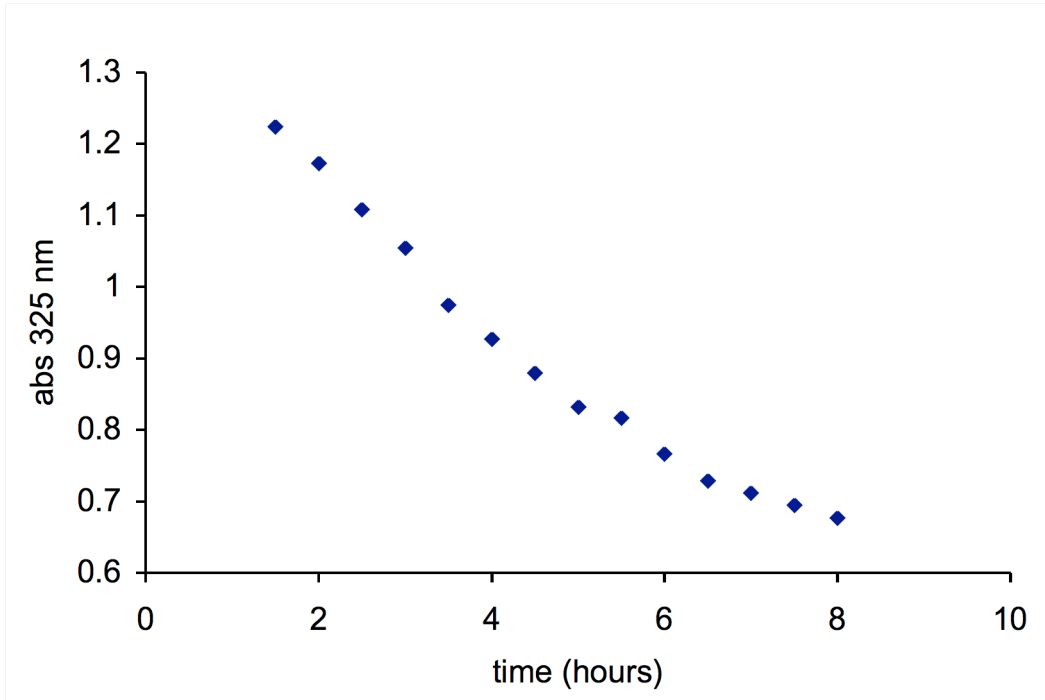

**Figure S4.** Degradation of SIH in MEM at 37 °C. The absorbance of SIH at 325 nm was recorded every 30 minutes for 8 h for a solution of 100  $\mu$ M SIH in MEM incubated at 37° C. The half-life for SIH stability under these conditions is  $t_{1/2} = 7$  h. A previous report found  $t_{1/2} = 2.7$  h for SIH in RPMI cell culture media.[2]

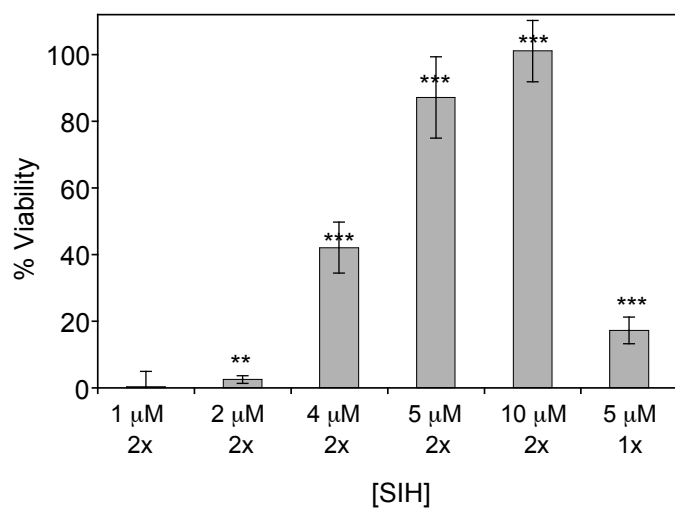

**Figure S5.** Double dosing protocol improves the efficacy of SIH. ARPE-19 cells were pre-incubated with 1, 2, 4, 5, or 10  $\mu\text{M}$  SIH for 30 min, followed by treatment with 500  $\mu\text{M}$   $\text{H}_2\text{O}_2$  and an additional dose of SIH at the same concentration as the first dose. The final column shows data for cells that were not pre-treated, but only received 5  $\mu\text{M}$  SIH at the same time they were treated with 500  $\mu\text{M}$   $\text{H}_2\text{O}_2$ . Cell viability was monitored by the CellTiter Blue assay after 15 h. Statistical significance is indicated relative to samples exposed to  $\text{H}_2\text{O}_2$  but given no chelator/prochelator treatment: \*\*  $p < 0.01$ , \*\*\*  $p < 0.001$ .

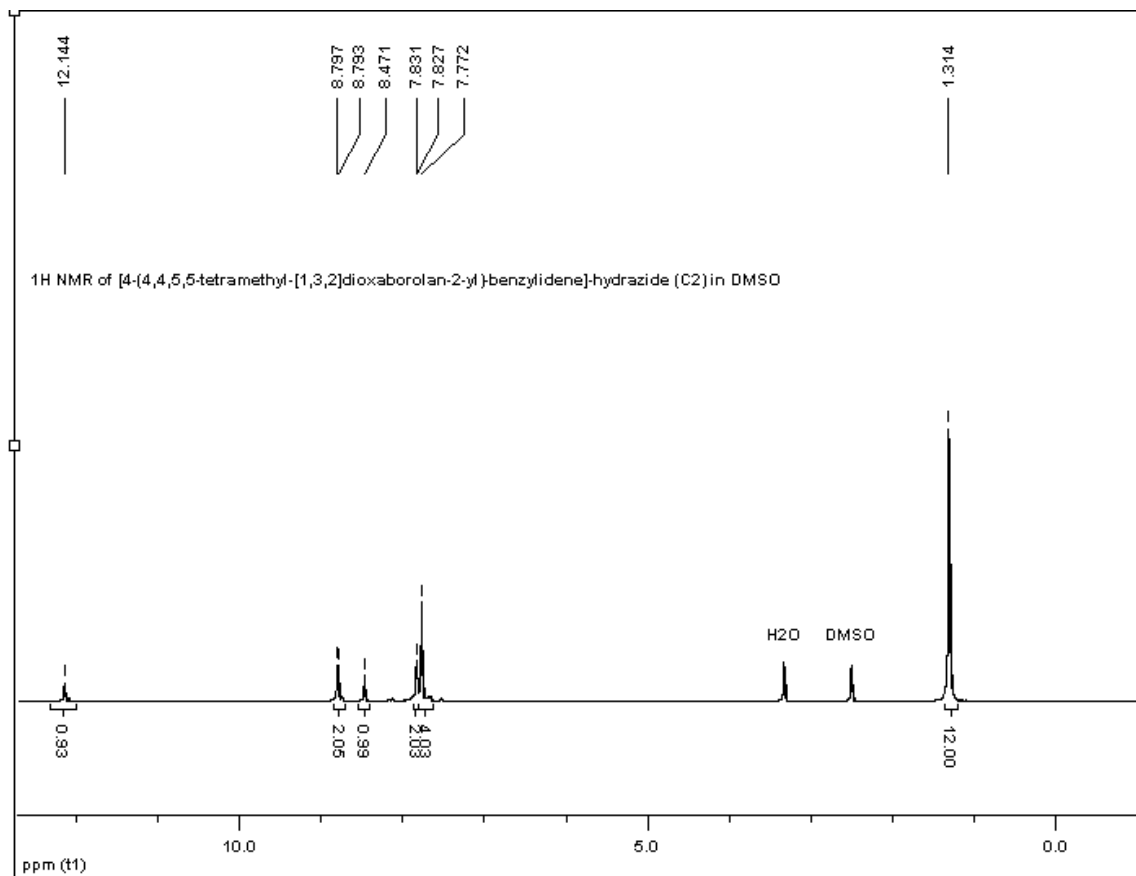

**Figure S6.**  $^1\text{H}$  NMR spectrum of C2 ([4-(4,4,5,5-tetramethyl-[1,3,2]dioxaborolan-2-yl)benzylidene]hydrazide).

## References.

- [1] L. K. Charkoudian, D. M. Pham, A. Kwan, A. Vangeloff, K. J. Franz, Dalton Trans., 43 (2007) 4873-5092.
- [2] J. L. Buss, P. Ponka, Biochim. Biophys. Acta, 1619 (2003) 177-186.
